# Supplementary material for: Assessing Smoking Status and Risk of SARS-CoV-2 Infection: A Machine Learning Approach among Veterans
Source: MDPI journal article supplement (doi:10.3390/healthcare10071244), 2022-07-04
Supplement: s1 [file s1]

## Article

# Title: Assessing Smoking Status and Risk of SARS CoV-2 Infection: A Machine Learning Approach among Veterans

Alice B. S. Nono Djotsa<sup>1,2,3</sup>, Drew A. Helmer<sup>1,2</sup>, Catherine Park<sup>1,2,3</sup>, Kristine E. Lynch<sup>4</sup>, Amir Sharafkhaneh<sup>1,2</sup>, Aanand D. Naik<sup>1,5</sup>, Javad Razjouyan<sup>1,2,\*</sup>, Christopher I. Amos<sup>2</sup>

<sup>1</sup> VA HSR&D Center for Innovations in Quality, Effectiveness and Safety, Michael E. DeBakey VA Medical Center, Houston, TX 77030, USA; Alice.NonoDjotsa@va.gov (A.N.D.), Drew.Helmer@va.gov (D.H.), catherine.park@va.gov (C.P.), SHARAFKHANEH.AMIR@va.gov (A.S.), Aanand.Naik@va.gov (A.N.), javad.razjouyan@va.gov (J.R.).

<sup>2</sup> Department of Medicine, Baylor College of Medicine, Houston, TX 77030, USA; Alice.NonoDjotsa@bcm.edu (A.N.D.), Drew.Helmer@bcm.edu (D.H.), catherine.park@bcm.edu (C.P.), amirs@bcm.edu (A.S.), javad.razjouyan@bcm.edu (JR), Chris.Amos@bcm.edu (C.A.).

<sup>3</sup> Big Data Scientist Training Enhancement Program (BD-STEP), VA Office of Research and Development, Washington, DC.

<sup>4</sup> VA Salt Lake City Health Care System and University of Utah, Salt Lake City, UT, 84148 USA; Kristine.Lynch@va.gov (K.L.).

<sup>5</sup> Department of Management, Policy and Community Health, UTHealth School of Public Health, Houston, TX 77030, USA; aanand.naik@uth.tmc.edu (A.N.).

\* Correspondence: javad.razjouyan@bcm.edu ; javad.razjouyan@va.gov; Tel.: +1-713-798-7928

**Citation:** Nono Djotsa, A. B. S.; Helmer, A. D.; Park, C.; Lynch, E. K.; Sharafkhaneh, A.; Naik, D. A.; Razjouyan, J.; Amos, I. C. Assessing Smoking Status and Risk of SARS-CoV-2 Infection: A Machine Learning Approach among Veterans. *Healthcare* **2022**, *10*, 1244. <https://doi.org/10.3390/healthcare10071244>

Academic Editor: Marco Dettori

Received: 3 May 2022

Accepted: 27 June 2022

Published: 4 July 2022

**Publisher's Note:** MDPI stays neutral with regard to jurisdictional claims in published maps and institutional affiliations.

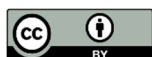

**Copyright:** © 2022 by the authors. Submitted for possible open access publication under the terms and conditions of the Creative Commons Attribution (CC BY) license (<https://creativecommons.org/licenses/by/4.0/>).

## Supplementary Materials

Table S1. Full list of all patients' characteristics.

| Variables                                 | Never<br>Smoker<br>n= 380648<br>(32.3%) | Former<br>Smoker<br>n=456348<br>(38.8%) | p-value | Current<br>Smoker<br>n= 221515<br>(18.8%) | p-<br>value | Unknown<br>n = 117795<br>(10.0%) | p-<br>value |
|-------------------------------------------|-----------------------------------------|-----------------------------------------|---------|-------------------------------------------|-------------|----------------------------------|-------------|
| Tested positive                           | 85605 (22.5)                            | 93665 (20.5)                            | 0.0001  | 26809 (12.1)                              | 0.0001      | 24171 (20.5)                     | 0.0001      |
| Sex (Male)                                | 318343 (83.6)                           | 422136 (92.5)                           | 0.0001  | 202063 (91.2)                             | 0.0001      | 74857 (63.5)                     | 0.0001      |
| <b>Race</b>                               |                                         |                                         |         |                                           |             |                                  |             |
| White                                     | 239184 (62.8)                           | 332558 (72.9)                           | 0.0001  | 150741 (68.1)                             | 0.0001      | 47987 (40.7)                     | 0.0001      |
| Black                                     | 101211 (26.6)                           | 83695 (18.3)                            | 0.0001  | 53037 (23.9)                              | 0.0001      | 17251 (14.6)                     | 0.0001      |
| Others                                    | 40253 (10.6)                            | 40095 (8.8)                             | 0.0001  | 17737 (8.0)                               | 0.0001      | 52557 (44.6)                     | 0.0001      |
| <b>Ethnicity</b>                          |                                         |                                         |         |                                           |             |                                  |             |
| Non-Hispanic or Latino                    | 325720 (85.6)                           | 406810 (89.1)                           | 0.0001  | 202003 (91.2)                             | 0.0001      | 64420 (54.7)                     | 0.0001      |
| Hispanic Or Latino                        | 41593 (10.9)                            | 34679 (7.6)                             | 0.0001  | 12506 (5.6)                               | 0.0001      | 7567 (6.4)                       | 0.0001      |
| Unknown                                   | 13335 (3.5)                             | 14859 (3.3)                             | 0.0001  | 7006 (3.2)                                | 0.0001      | 45808 (38.9)                     | 0.0001      |
| <b>Age [Mean, SD]</b>                     |                                         |                                         |         |                                           |             |                                  |             |
| Age 18–30                                 | 17299 (4.5)                             | 10373 (2.3)                             | 0.0001  | 9122 (4.1)                                | 0.0001      | 15584 (13.2)                     | 0.0001      |
| Age 30–40                                 | 42223 (11.1)                            | 34708 (7.6)                             | 0.0001  | 26861 (12.1)                              | 0.0001      | 26233 (22.3)                     | 0.0001      |
| Age 40–50                                 | 50187 (13.2)                            | 35889 (7.9)                             | 0.0001  | 23508 (10.6)                              | 0.0001      | 20558 (17.5)                     | 0.0001      |
| Age 50–65                                 | 116777 (30.7)                           | 111103 (24.3)                           | 0.0001  | 83803 (37.8)                              | 0.0001      | 28990 (24.6)                     | 0.0001      |
| Age 65–75                                 | 101991 (26.8)                           | 172289 (37.8)                           | 0.0001  | 64754 (29.2)                              | 0.0001      | 15546 (13.2)                     | 0.0001      |
| Age 75–85                                 | 36647 (9.6)                             | 67834 (14.9)                            | 0.0001  | 11668 (5.3)                               | 0.0001      | 6539 (5.6)                       | 0.0001      |
| Age > 85                                  | 15524 (4.1)                             | 24152 (5.3)                             | 0.0001  | 1799 (0.8)                                | 0.0001      | 4344 (3.7)                       | 0.0001      |
| <b>BMI [Mean, SD]</b>                     |                                         |                                         |         |                                           |             |                                  |             |
| BMI < 18.5                                | 3048 (0.8)                              | 5820 (1.3)                              | 0.0001  | 6732 (3.0)                                | 0.0001      | 1919 (1.6)                       | 0.0001      |
| 18.5 ≤ BMI < 30                           | 188058 (49.4)                           | 236762 (51.9)                           | 0.0001  | 133593 (60.3)                             | 0.0001      | 70140 (59.5)                     | 0.0001      |
| BMI ≥ 30                                  | 189542 (49.8)                           | 213766 (46.8)                           | 0.0001  | 81190 (36.7)                              | 0.0001      | 45736 (38.8)                     | 0.0001      |
| <b>Pre-existing Conditions</b>            |                                         |                                         |         |                                           |             |                                  |             |
| Acute Cardiac Injury, N(%)                | 6715 (1.8)                              | 13242 (2.9)                             | 0.0001  | 5647 (2.5)                                | 0.0001      | 1144 (1.0)                       | 0.0001      |
| Acute Liver Injury, N(%)                  | 551 (0.1)                               | 943 (0.2)                               | 0.0001  | 653 (0.3)                                 | 0.0001      | 146 (0.1)                        | > 0.05      |
| Acute Myocardial Infarction, N(%)         | 6703 (1.8)                              | 13210 (2.9)                             | 0.0001  | 5637 (2.5)                                | 0.0001      | 1142 (1.0)                       | 0.0001      |
| Acute Respiratory Failure, N(%)           | 12331 (3.2)                             | 29309 (6.4)                             | 0.0001  | 12831 (5.8)                               | 0.0001      | 2591 (2.2)                       | 0.0001      |
| Acute Rheumatic Heart Disease, N(%)       | 19 (0.0)                                | 29 (0.0)                                |         | 11 (0.0)                                  |             | 3 (0.0)                          |             |
| Acute Kidney Failure, N(%)                | 22825 (6.0)                             | 40092 (8.8)                             | 0.0001  | 16371 (7.4)                               | 0.0001      | 4066 (3.5)                       | 0.0001      |
| Alcohol Dependence, N(%)                  | 63960 (16.8)                            | 102131 (22.4)                           | 0.0001  | 85961 (38.8)                              | 0.0001      | 7732 (6.6)                       | 0.0001      |
| Anxiety, N(%)                             | 89184 (23.4)                            | 99137 (21.7)                            | 0.0001  | 60585 (27.4)                              | 0.0001      | 9058 (7.7)                       | 0.0001      |
| Acute Respiratory Distress Syndrome, N(%) | 206 (0.1)                               | 373 (0.1)                               | > 0.05  | 183 (0.1)                                 | > 0.05      | 38 (0.0)                         | 0.0001      |
| Asthma, N(%)                              | 32606 (8.6)                             | 32184 (7.1)                             | 0.0001  | 11261 (5.1)                               | 0.0001      | 2572 (2.2)                       | 0.0001      |
| Bipolar Disorder, N(%)                    | 14122 (3.7)                             | 19188 (4.2)                             | 0.0001  | 17678 (8.0)                               | 0.0001      | 2074 (1.8)                       | 0.0001      |

|                                             |               |               |        |               |         |              |        |
|---------------------------------------------|---------------|---------------|--------|---------------|---------|--------------|--------|
| Breastfeeding, N(%)                         | 475 (0.1)     | 236 (0.1)     | > 0.05 | 88 (0.0)      | 0.0001  | 80 (0.1)     | > 0.05 |
| Breastfeed At Index                         | 10 (0.0)      | 4 (0.0)       |        | 3 (0.0)       |         | 1 (0.0)      |        |
| Bronchitis, N(%)                            | 25599 (6.7)   | 36357 (8.0)   | 0.0001 | 19134 (8.6)   | 0.0001  | 2687 (2.3)   | 0.0001 |
| Coronary Atherosclerosis and other          |               |               | 0.0001 |               | 0.0001  |              | 0.0001 |
| Heart Disease, N(%)                         | 63009 (16.6)  | 118778 (26.0) |        | 42141 (19.0)  |         | 7274 (6.2)   |        |
| Cancer, N(%)                                | 73409 (19.3)  | 116775 (25.6) | 0.0001 | 48138 (21.7)  | 0.0001  | 8330 (7.1)   | 0.0001 |
| Cardiomyopathy, N(%)                        | 11670 (3.1)   | 20183 (4.4)   | 0.0001 | 7878 (3.6)    | 0.0001  | 1388 (1.2)   | 0.0001 |
| Cerebrovascular Disease, N(%)               | 6863 (1.8)    | 11416 (2.5)   | 0.0001 | 4570 (2.1)    | 0.0001  | 1044 (0.9)   | 0.0001 |
| Congestive Heart Failure, N(%)              | 24805 (6.5)   | 47469 (10.4)  | 0.0001 | 15537 (7.0)   | 0.0001  | 3671 (3.1)   | 0.0001 |
| Chronic hepatitis, N(%)                     | 779 (0.2)     | 1436 (0.3)    | 0.0001 | 1351 (0.6)    | 0.0001  | 169 (0.1)    | 0.0001 |
| Chronic Lung Disease, N(%)                  | 100324 (26.4) | 171849 (37.7) | 0.0001 | 92835 (41.9)  | 0.0001  | 11099 (9.4)  | 0.0001 |
| Chronic Neurological Disease, N(%)          | 14728 (3.9)   | 17366 (3.8)   | 0.018  | 5928 (2.7)    | 0.0001  | 2352 (2.0)   | 0.0001 |
| Chronic Rheumatic Heart Disease, N(%)       | 3376 (0.9)    | 5638 (1.2)    | 0.0001 | 1644 (0.7)    | 0.0001  | 420 (0.4)    | 0.0001 |
| Cirrhosis, N(%)                             | 6895 (1.8)    | 13333 (2.9)   | 0.0001 | 8418 (3.8)    | 0.0001  | 1659 (1.4)   | 0.0001 |
| Chronic Kidney Disease, N(%)                | 49213 (12.9)  | 76070 (16.7)  | 0.0001 | 22267 (10.1)  | 0.0001  | 5697 (4.8)   | 0.0001 |
| Chronic Kidney Failure, N(%)                | 5853 (1.5)    | 8660 (1.9)    | 0.0001 | 2485 (1.1)    | 0.0001  | 997 (0.8)    | 0.0001 |
| Complex Sleep Apnea, N(%)                   | 72 (0.0)      | 82 (0.0)      |        | 29 (0.0)      |         | 8 (0.0)      |        |
| Chronic Obstructive Pulmonary Disease, N(%) | 36137 (9.5)   | 101866 (22.3) | 0.0001 | 64124 (28.9)  | 0.0001  | 5982 (5.1)   | 0.0001 |
| Central sleep Apnea Primary, N(%)           | 1472 (0.4)    | 1951 (0.4)    | > 0.05 | 649 (0.3)     | 0.0001  | 128 (0.1)    | 0.0001 |
| Central serous retinopathy, N(%)            | 811 (0.2)     | 1295 (0.3)    | 0.0001 | 379 (0.2)     | > 0.05  | 72 (0.1)     | 0.0001 |
| Cardiovascular Disease, N(%)                | 113136 (29.7) | 189991 (41.6) | 0.0001 | 74726 (33.7)  | 0.0001  | 13663 (11.6) | 0.0001 |
| Dementia, N(%)                              | 14937 (3.9)   | 23270 (5.1)   | 0.0001 | 6417 (2.9)    | 0.0001  | 4435 (3.8)   | 0.123  |
| Diabetes Any, N(%)                          | 119904 (31.5) | 170917 (37.5) | 0.0001 | 61119 (27.6)  | 0.0001  | 12753 (10.8) | 0.0001 |
| Diabetes Other, N(%)                        | 11692 (3.1)   | 17364 (3.8)   | 0.0001 | 6193 (2.8)    | 0.0001  | 1226 (1.0)   | 0.0001 |
| Diabetes Type 1, N(%)                       | 6767 (1.8)    | 9445 (2.1)    | 0.0001 | 3445 (1.6)    | 0.0001  | 728 (0.6)    | 0.0001 |
| Diabetes Type 2, N(%)                       | 118959 (31.3) | 169769 (37.2) | 0.0001 | 60575 (27.3)  | 0.0001  | 12548 (10.7) | 0.0001 |
| Diabetes With Complications, N(%)           | 83422 (21.9)  | 123064 (27.0) | 0.0001 | 42028 (19.0)  | 0.0001  | 8772 (7.4)   | 0.0001 |
| Diabetes Without Complications, N(%)        | 108246 (28.4) | 154275 (33.8) | 0.0001 | 54757 (24.7)  | 0.0001  | 10576 (9.0)  | 0.0001 |
| Drug Dependence, N(%)                       | 10998 (2.9)   | 23280 (5.1)   | 0.0001 | 34315 (15.5)  | 0.0001  | 2826 (2.4)   | 0.0001 |
| Emphysema, N(%)                             | 3092 (0.8)    | 12544 (2.7)   | 0.0001 | 8342 (3.8)    | 0.0001  | 597 (0.5)    | 0.0001 |
| Guillain-Barre Syndrome, N(%)               | 235 (0.1)     | 306 (0.1)     | > 0.05 | 107 (0.0)     | 0.0001  | 20 (0.0)     | 0.0001 |
| Heart Disease, N(%)                         | 81153 (21.3)  | 145589 (31.9) | 0.0001 | 52375 (23.6)  | 0.0001  | 9872 (8.4)   | 0.0001 |
| Heart Failure, N(%)                         | 31152 (8.2)   | 58606 (12.8)  | 0.0001 | 19333 (8.7)   | 0.0001  | 4552 (3.9)   | 0.0001 |
| Hemorrhagic Stroke, N(%)                    | 925 (0.2)     | 1379 (0.3)    | 0.0001 | 531 (0.2)     | > 0.05  | 170 (0.1)    | 0.0001 |
| Human Immunodeficiency Virus, N(%)          | 3354 (0.9)    | 3766 (0.8)    | 0.0001 | 2736 (1.2)    | 0.0001  | 828 (0.7)    | 0.0001 |
| Hypertension, N(%)                          | 226370 (59.5) | 316762 (69.4) | 0.0001 | 132837 (60.0) | 0.00013 | 22791 (19.3) | 0.0001 |
| Hyperlipidemia, N(%)                        | 218820 (57.5) | 297932 (65.3) | 0.0001 | 121331 (54.8) | 0.0001  | 17705 (15.0) | 0.0001 |
| Inflammatory bowel Disease, N(%)            | 12803 (3.4)   | 17101 (3.7)   | 0.0001 | 7833 (3.5)    | 0.0404  | 1622 (1.4)   | 0.0001 |
| Influenza, N(%)                             | 7202 (1.9)    | 8856 (1.9)    | > 0.05 | 4650 (2.1)    | 0.0001  | 1182 (1.0)   | 0.0001 |
| Ischemic Stroke, N(%)                       | 15716 (4.1)   | 25963 (5.7)   | 0.0001 | 10702 (4.8)   | 0.0001  | 2479 (2.1)   | 0.0001 |
| Kidney Disease All, N(%)                    | 82051 (21.6)  | 121420 (26.6) | 0.0001 | 43206 (19.5)  | 0.0001  | 9712 (8.2)   | 0.0001 |

|                                                     |               |               |        |               |        |              |        |
|-----------------------------------------------------|---------------|---------------|--------|---------------|--------|--------------|--------|
| Liver Disease, N(%)                                 | 25722 (6.8)   | 36334 (8.0)   | 0.0001 | 19167 (8.7)   | 0.0001 | 3199 (2.7)   | 0.0001 |
| Lower Respiratory Infection, N(%)                   | 32746 (8.6)   | 38228 (8.4)   | 0.0011 | 18067 (8.2)   | 0.0001 | 4171 (3.5)   | 0.0001 |
| Major Depressive Disorder, N(%)                     | 138385 (36.4) | 157528 (34.5) | 0.0001 | 96981 (43.8)  | 0.0001 | 14395 (12.2) | 0.0001 |
| Measles, N(%)                                       | 10 (0.0)      | 9 (0.0)       |        | 4 (0.0)       |        | 3 (0.0)      |        |
| Multiple Sclerosis, N(%)                            | 1757 (0.5)    | 2051 (0.4)    | 0.0001 | 852 (0.4)     | 0.0001 | 349 (0.3)    | 0.0001 |
| Nephrosis, N(%)                                     | 10643 (2.8)   | 16172 (3.5)   | 0.0001 | 4765 (2.2)    | 0.0001 | 1181 (1.0)   | 0.0001 |
| Obesity Hypoventilation, N(%)                       | 1579 (0.4)    | 2519 (0.6)    | 0.0001 | 759 (0.3)     | 0.0001 | 230 (0.2)    | 0.0001 |
| Obstructive Sleep Apnea, N(%)                       | 128680 (33.8) | 152873 (33.5) | 0.0001 | 55524 (25.1)  | 0.0001 | 9929 (8.4)   | 0.0001 |
| Other and Ill-Defined Heart Disease, N(%)           | 10359 (2.7)   | 16653 (3.6)   | 0.0001 | 5996 (2.7)    | > 0.05 | 1392 (1.2)   | 0.0001 |
| Overweight, N(%)                                    | 29827 (7.8)   | 31900 (7.0)   | 0.0001 | 10319 (4.7)   | 0.0001 | 4907 (4.2)   | 0.0001 |
| Peripheral Artery Disease, N(%)                     | 34538 (9.1)   | 67723 (14.8)  | 0.0001 | 31710 (14.3)  | 0.0001 | 5122 (4.3)   | 0.0001 |
| Parkinsons Disease, N(%)                            | 5125 (1.3)    | 7112 (1.6)    | 0.0001 | 1425 (0.6)    | 0.0001 | 951 (0.8)    | 0.0001 |
| Polycystic Ovary Syndrome, N(%)                     | 1067 (0.3)    | 482 (0.1)     | 0.0001 | 241 (0.1)     | 0.0001 | 62 (0.1)     | 0.0001 |
| Pneumonia, N(%)                                     | 15814 (4.2)   | 31011 (6.8)   | 0.0001 | 13667 (6.2)   | 0.0001 | 3082 (2.6)   | 0.0001 |
| Ventilator-Associated Pneumonia, N(%)               | 64 (0.0)      | 129 (0.0)     |        | 64 (0.0)      |        | 30 (0.0)     |        |
| Pregnancy, N(%)                                     | 2097 (0.6)    | 1200 (0.3)    | 0.0001 | 543 (0.2)     | 0.0001 | 583 (0.5)    | 0.0001 |
| Pregnancy at Index, N(%)                            | 490 (0.1)     | 324 (0.1)     | > 0.05 | 146 (0.1)     | > 0.05 | 234 (0.2)    | 0.0001 |
| Posttraumatic Stress Disorder, N(%)                 | 100159 (26.3) | 115852 (25.4) | 0.0001 | 68945 (31.1)  | 0.0001 | 10316 (8.8)  | 0.0001 |
| Pulmonary Heart Disease, N(%)                       | 6676 (1.8)    | 13010 (2.9)   | 0.0001 | 4050 (1.8)    | > 0.05 | 959 (0.8)    | 0.0001 |
| Schizophrenia, N(%)                                 | 7612 (2.0)    | 10818 (2.4)   | 0.0001 | 11573 (5.2)   | 0.0001 | 1859 (1.6)   | 0.0001 |
| Septic Shock, N(%)                                  | 7577 (2.0)    | 14012 (3.1)   | 0.0001 | 5810 (2.6)    | 0.0001 | 2015 (1.7)   | 0.0001 |
| Sickle Cell Disease, N(%)                           | 868 (0.2)     | 637 (0.1)     | 0.0001 | 344 (0.2)     | > 0.05 | 67 (0.1)     | 0.0001 |
| Sleep Related Non-Obstructive Hypoventilation, N(%) | 1300 (0.3)    | 2490 (0.5)    | 0.0001 | 849 (0.4)     | 0.0001 | 124 (0.1)    | 0.0001 |
| Spleen Removed, N(%)                                | 517 (0.1)     | 759 (0.2)     | 0.0001 | 380 (0.2)     | 0.0001 | 68 (0.1)     | > 0.05 |
| Urinary Stones, N(%)                                | 38176 (10.0)  | 52765 (11.6)  | 0.0001 | 19089 (8.6)   | 0.0001 | 4276 (3.6)   | 0.0001 |
| Venous Thromboembolism, N(%)                        | 9158 (2.4)    | 13571 (3.0)   | 0.0001 | 5474 (2.5)    | 0.0159 | 1232 (1.0)   | 0.0001 |
| <b>Pre-infection Medications</b>                    |               |               |        |               |        |              |        |
| Acetyl Cholinesterase (ACE) Inhibitor, N(%)         | 99074 (26.0)  | 144906 (31.8) | 0.0001 | 65228 (29.4)  | 0.0001 | 9944 (8.4)   | 0.0001 |
| Acetaminophen, N(%)                                 | 140220 (36.8) | 187679 (41.1) | 0.0001 | 97082 (43.8)  | 0.0001 | 18717 (15.9) | 0.0001 |
| Androgen deprivation therapy, N(%)                  | 4172 (1.1)    | 6012 (1.3)    | 0.0001 | 2102 (0.9)    | 0.0001 | 470 (0.4)    | 0.0001 |
| Albumin, N(%)                                       | 1896 (0.5)    | 3682 (0.8)    | 0.0001 | 1589 (0.7)    | 0.0001 | 456 (0.4)    | 0.0001 |
| Allopurinol, N(%)                                   | 24223 (6.4)   | 33987 (7.4)   | 0.0001 | 8989 (4.1)    | 0.0001 | 1947 (1.7)   | 0.0001 |
| Alphablocker, N(%)                                  | 99655 (26.2)  | 149798 (32.8) | 0.0001 | 61513 (27.8)  | 0.0001 | 10161 (8.6)  | 0.0001 |
| Antianginal, N(%)                                   | 25447 (6.7)   | 48572 (10.6)  | 0.0001 | 17027 (7.7)   | 0.0001 | 2818 (2.4)   | 0.0001 |
| Antiarrhythmic, N(%)                                | 7916 (2.1)    | 14177 (3.1)   | 0.0001 | 3901 (1.8)    | 0.0001 | 976 (0.8)    | 0.0001 |
| Antibiotic, N(%)                                    | 156249 (41.0) | 205848 (45.1) | 0.0001 | 101168 (45.7) | 0.0001 | 20365 (17.3) | 0.0001 |
| Anticoagulant Inpatient, N(%)                       | 43903 (11.5)  | 79260 (17.4)  | 0.0001 | 36785 (16.6)  | 0.0001 | 7715 (6.5)   | 0.0001 |
| Anticoagulant Outpatient, N(%)                      | 51501 (13.5)  | 91730 (20.1)  | 0.0001 | 31645 (14.3)  | 0.0001 | 5594 (4.7)   | 0.0001 |
| Antihistamine, N(%)                                 | 163405 (42.9) | 195617 (42.9) | > 0.05 | 98457 (44.4)  | 0.0001 | 16242 (13.8) | 0.0001 |

|                                                               |               |               |        |               |        |              |        |
|---------------------------------------------------------------|---------------|---------------|--------|---------------|--------|--------------|--------|
| Antipsychotic, N(%)                                           | 30686 (8.1)   | 41224 (9.0)   | 0.0001 | 34934 (15.8)  | 0.0001 | 4585 (3.9)   | 0.0001 |
| Antiviral, N(%)                                               | 34109 (9.0)   | 37739 (8.3)   | 0.0001 | 19329 (8.7)   | 0.0001 | 5948 (5.0)   | 0.0001 |
| Angiotensin II Receptor Blocker, N(%)                         | 51761 (13.6)  | 71243 (15.6)  | 0.0001 | 22206 (10.0)  | 0.0001 | 4153 (3.5)   | 0.0001 |
| Aromatase Inhibitors, N(%)                                    | 825 (0.2)     | 525 (0.1)     | 0.0001 | 246 (0.1)     | 0.0001 | 58 (0.0)     | 0.0001 |
| Azithromycin, N(%)                                            | 35610 (9.4)   | 51654 (11.3)  | 0.0001 | 26702 (12.1)  | 0.0001 | 4594 (3.9)   | 0.0001 |
| Bacillus Calmette-Guerin, N(%)                                | 404 (0.1)     | 1188 (0.3)    | 0.0001 | 435 (0.2)     | 0.0001 | 51 (0.0)     | 0.0001 |
| Benzodiazepine, N(%)                                          | 42551 (11.2)  | 59332 (13.0)  | 0.0001 | 36452 (16.5)  | 0.0001 | 5207 (4.4)   | 0.0001 |
| Beta Agonist Nebulizer, N(%)                                  | 26255 (6.9)   | 53791 (11.8)  | 0.0001 | 28165 (12.7)  | 0.0001 | 4485 (3.8)   | 0.0001 |
| Beta Blocker, N(%)                                            | 112848 (29.6) | 177470 (38.9) | 0.0001 | 71001 (32.1)  | 0.0001 | 12367 (10.5) | 0.0001 |
| Bronchodilator, N(%)                                          | 75167 (19.7)  | 130087 (28.5) | 0.0001 | 74386 (33.6)  | 0.0001 | 8600 (7.3)   | 0.0001 |
| Calcium Channel Blocker, N(%)                                 | 93177 (24.5)  | 132587 (29.1) | 0.0001 | 57700 (26.0)  | 0.0001 | 9387 (8.0)   | 0.0001 |
| Chloroquine, N(%)                                             | 9 (0.0)       | 9 (0.0)       |        | 2 (0.0)       |        | 0 (0.0)      |        |
| Cis-atracurium, N(%)                                          | 64 (0.0)      | 114 (0.0)     |        | 63 (0.0)      |        | 10 (0.0)     |        |
| Colchicine, N(%)                                              | 9877 (2.6)    | 13471 (3.0)   | 0.0001 | 4338 (2.0)    | 0.0001 | 850 (0.7)    | 0.0001 |
| Corticosteroid, N(%)                                          | 138794 (36.5) | 189501 (41.5) | 0.0001 | 86454 (39.0)  | 0.0001 | 13861 (11.8) | 0.0001 |
| Degarelix, N(%)yrs                                            | 71 (0.0)      | 89 (0.0)      |        | 34 (0.0)      |        | 15 (0.0)     |        |
| Dexamethasone, N(%)                                           | 13688 (3.6)   | 18955 (4.2)   | 0.0001 | 8981 (4.1)    | 0.0001 | 1835 (1.6)   | 0.0001 |
| Dobutamine, N(%)                                              | 341 (0.1)     | 709 (0.2)     | 0.0001 | 213 (0.1)     | > 0.05 | 43 (0.0)     | 0.0001 |
| Eculizumab, N(%)                                              | 7 (0.0)       | 8 (0.0)       |        | 3 (0.0)       |        | 0 (0.0)      |        |
| Epinephrine, N(%)                                             | 11341 (3.0)   | 12637 (2.8)   | 0.0001 | 5657 (2.6)    | 0.0001 | 1060 (0.9)   | 0.0001 |
| Estrogen, N(%)                                                | 12269 (3.2)   | 7536 (1.7)    | 0.0001 | 3680 (1.7)    | 0.0001 | 911 (0.8)    | 0.0001 |
| Famotidine, N(%)                                              | 32110 (8.4)   | 42797 (9.4)   | 0.0001 | 19202 (8.7)   | 0.0001 | 3316 (2.8)   | 0.0001 |
| Furosemide, N(%)                                              | 37342 (9.8)   | 68350 (15.0)  | 0.0001 | 22713 (10.3)  | 0.0001 | 5194 (4.4)   | 0.0001 |
| Glucocorticoid, N(%)                                          | 83724 (22.0)  | 112888 (24.7) | 0.0001 | 56713 (25.6)  | 0.0001 | 9589 (8.1)   | 0.0001 |
| Histamine 2 Receptor Blocker, N(%)                            | 33603 (8.8)   | 43993 (9.6)   | 0.0001 | 19824 (8.9)   | > 0.05 | 3187 (2.7)   | 0.0001 |
| Hydrochlorothiazide, N(%)                                     | 60649 (15.9)  | 77779 (17.0)  | 0.0001 | 33962 (15.3)  | 0.0001 | 5139 (4.4)   | 0.0001 |
| Hydroxychloroquine, N(%)                                      | 3291 (0.9)    | 3989 (0.9)    | > 0.05 | 1382 (0.6)    | 0.0001 | 264 (0.2)    | 0.0001 |
| Inhaled Corticosteroids, N(%)                                 | 7947 (2.1)    | 11208 (2.5)   | 0.0001 | 4006 (1.8)    | 0.0001 | 679 (0.6)    | 0.0001 |
| Inhaled Corticosteroids and Long-Acting<br>Beta-Agonist, N(%) | 29494 (7.7)   | 61378 (13.4)  | 0.0001 | 33023 (14.9)  | 0.0001 | 3170 (2.7)   | 0.0001 |
| Induction Ventilation Medications, N(%)                       | 6615 (1.7)    | 10240 (2.2)   | 0.0001 | 4827 (2.2)    | 0.0001 | 935 (0.8)    | 0.0001 |
| Inhaled Budesonide, N(%)                                      | 1290 (0.3)    | 1999 (0.4)    | 0.0001 | 575 (0.3)     | > 0.05 | 156 (0.1)    | 0.0001 |
| Inhaled Epo-prostenol, N(%)                                   | 29 (0.0)      | 69 (0.0)      |        | 16 (0.0)      |        | 6 (0.0)      |        |
| Isoproterenol, N(%)                                           | 35 (0.0)      | 66 (0.0)      |        | 24 (0.0)      |        | 7 (0.0)      |        |
| Long-Acting Beta-Agonist, N(%)                                | 766 (0.2)     | 2402 (0.5)    | 0.0001 | 974 (0.4)     | 0.0001 | 106 (0.1)    | 0.0001 |
| Lopinavir, N(%)                                               | 20 (0.0)      | 30 (0.0)      |        | 24 (0.0)      |        | 5 (0.0)      |        |
| Losartan, N(%)                                                | 47113 (12.4)  | 63735 (14.0)  | 0.0001 | 20044 (9.0)   | 0.0001 | 3754 (3.2)   | 0.0001 |
| Metformin, N(%)                                               | 72749 (19.1)  | 100442 (22.0) | 0.0001 | 38267 (17.3)  | 0.0001 | 6021 (5.1)   | 0.0001 |
| Milrinone, N(%)                                               | 181 (0.0)     | 370 (0.1)     | 0.0001 | 101 (0.0)     |        | 19 (0.0)     |        |
| Norepinephrine, N(%)                                          | 1289 (0.3)    | 2775 (0.6)    | 0.0001 | 1097 (0.5)    | 0.0001 | 330 (0.3)    | 0.975  |
| Non-steroidal Anti-Inflammatory Drug,<br>N(%)                 | 235755 (61.9) | 285628 (62.6) | 0.0001 | 145315 (65.6) | 0.0001 | 27160 (23.1) | 0.0001 |

|                                                           |               |               |        |               |        |              |        |
|-----------------------------------------------------------|---------------|---------------|--------|---------------|--------|--------------|--------|
| Opioid, N(%)                                              | 16907 (4.4)   | 28996 (6.4)   | 0.0001 | 17443 (7.9)   | 0.0001 | 2676 (2.3)   | 0.0001 |
| Platelet Aggregation Inhibitor, N(%)                      | 20287 (5.3)   | 40000 (8.8)   | 0.0001 | 16090 (7.3)   | 0.0001 | 2466 (2.1)   | 0.0001 |
| Phenylephrine, N(%)                                       | 6486 (1.7)    | 9446 (2.1)    | 0.0001 | 4064 (1.8)    | 0.004  | 753 (0.6)    | 0.0001 |
| Proton Pump Inhibitor, N(%)                               | 135932 (35.7) | 191245 (41.9) | 0.0001 | 84305 (38.1)  | 0.0001 | 13200 (11.2) | 0.0001 |
| Remdesivir, N(%)                                          | 10 (0.0)      | 32 (0.0)      |        | 4 (0.0)       |        | 2 (0.0)      |        |
| Ribavirin, N(%)                                           | 25 (0.0)      | 54 (0.0)      |        | 62 (0.0)      |        | 8 (0.0)      |        |
| Sarilumab, N(%)                                           | 1 (0.0)       | 9 (0.0)       |        | 2 (0.0)       |        | 0 (0.0)      |        |
| Selective Estrogen Receptor Degradar,<br>N(%)             | 19 (0.0)      | 18 (0.0)      |        | 9 (0.0)       |        | 4 (0.0)      |        |
| Selective Estrogen Receptor Modulators,<br>N(%)           | 469 (0.1)     | 355 (0.1)     | > 0.05 | 107 (0.0)     | 0.0001 | 30 (0.0)     | 0.0001 |
| Serotonin and Norepinephrine Reuptake<br>Inhibitors, N(%) | 52973 (13.9)  | 68321 (15.0)  | 0.0001 | 36673 (16.6)  | 0.0001 | 4533 (3.8)   | 0.0001 |
| Selective Serotonin Reuptake Inhibitors,<br>N(%)          | 79424 (20.9)  | 95112 (20.8)  | > 0.05 | 53298 (24.1)  | 0.0001 | 8411 (7.1)   | 0.0001 |
| Statin, N(%)                                              | 179529 (47.2) | 264318 (57.9) | 0.0001 | 109726 (49.5) | 0.0001 | 16040 (13.6) | 0.0001 |
| Tocilizumab, N(%)                                         | 119 (0.0)     | 222 (0.0)     |        | 75 (0.0)      |        | 10 (0.0)     |        |
| Tricyclic, N(%)                                           | 19769 (5.2)   | 21785 (4.8)   | 0.0001 | 12138 (5.5)   | 0.0001 | 1575 (1.3)   | 0.0001 |
| Valsartan, N(%)                                           | 5540 (1.5)    | 9045 (2.0)    | 0.0001 | 2624 (1.2)    | 0.0001 | 486 (0.4)    | 0.0001 |
| Vasopressin, N(%)                                         | 465 (0.1)     | 990 (0.2)     | 0.0001 | 345 (0.2)     | 0.0001 | 110 (0.1)    | > 0.05 |
| Vasopressor, N(%)                                         | 7571 (2.0)    | 11270 (2.5)   | 0.0001 | 4536 (2.0)    | > 0.05 | 1123 (1.0)   | 0.0001 |
| Vecuronium, N(%)                                          | 15 (0.0)      | 29 (0.0)      |        | 17 (0.0)      |        | 6 (0.0)      |        |

**Table S2a.** List of variables studied and results of most important variable selection from prevalence, Univariate Analysis, LASSO and sequential forward stepwise selection for Imputed data.

| Variables                                   | Prevalence<br>(%) | Univariate Analysis |            | LASS | Forward   | Logistic    |
|---------------------------------------------|-------------------|---------------------|------------|------|-----------|-------------|
|                                             |                   |                     |            | O    | Selection | regression  |
|                                             |                   |                     |            |      |           | Coefficient |
|                                             |                   | Beta                | pValue     |      |           | t           |
| Sex (male)                                  | 86.5              | 0.07                | P < 0.0001 | Yes  | Yes       |             |
| Age                                         |                   |                     |            |      |           |             |
| Age 18–30                                   | 3.6               | 0.14                | P < 0.0001 | Yes  | No        |             |
| Age 30–40                                   | 10.8              | 0.13                | P < 0.0001 | Yes  | No        |             |
| Age 40–50                                   | 10.6              | 0.17                | P < 0.0001 | Yes  | No        |             |
| Age 50–65                                   | 28.2              | -0.05               | P < 0.0001 | No   | No        |             |
| Age 65–75                                   | 30.1              | -0.2                | P < 0.0001 | Yes  | No        |             |
| Age 75–85                                   | 12.2              | 0.01                | P < 0.0001 | No   | No        |             |
| Age > 85                                    | 4.5               | 0.3                 | P < 0.0001 | Yes  | Yes       | 0.2830      |
| Race                                        |                   |                     |            |      |           |             |
| White, N(%)                                 | 65.5              | -0.03               | P = 0.0009 | Yes  | No        |             |
| Black , N(%)                                | 21.7              | 0                   | P > 0.05   | No   | No        |             |
| Other , N(%)                                | 12.8              | 0.06                | P < 0.0001 | Yes  | Yes       |             |
| Ethnicity                                   |                   |                     |            |      |           |             |
| Hispanic or Latino, N(%)                    | 8.1               |                     | P < 0.0001 | Yes  | Yes       | 0.1606      |
| BMI                                         |                   |                     |            |      |           |             |
| BMI < 18.5                                  | 1.5               | 0.29                | P < 0.0001 | Yes  | Yes       | -0.3120     |
| 18.5 ≤ BMI <30                              | 53.4              |                     | P < 0.0001 | No   |           |             |
| BMI ≥ 30                                    | 45.1              |                     | P < 0.0001 | Yes  | Yes       | 0.2695      |
| Acetyl Cholinesterase (ACE) Inhibitor, N(%) | 27.1              | -0.06               | P < 0.0001 | Yes  | No        |             |
| Acetaminophen, N(%)                         | 37.3              | -0.19               | P < 0.0001 | Yes  | No        |             |
| Acute Cardiac Injury, N(%)                  | 2.3               | -0.04               | P = 0.0002 | No   | No        |             |
| Acute Liver Injury, N(%)                    | < 1%              |                     | P > 0.05   | No   | No        |             |
| Acute Myocardial Infarction, N(%)           | 2.3               | -0.04               | P = 0.0002 | No   | No        |             |
| Acute Respiratory Failure, N(%)             | 4.9               | 0.1                 | P = 0.003  | Yes  | No        |             |
| Acute Rheumatic Heart Disease, N(%)         | < 1%              |                     | P > 0.05   | No   | No        |             |
| Androgen deprivation therapy, N(%)          | 1.1               | -0.27               | P < 0.0001 | Yes  | No        |             |
| Acute Kidney Failure, N(%)                  | 7.1               | 0.02                | P = 0.012  | No   | No        |             |
| Albumin, N(%)                               | < 1%              |                     | P > 0.05   | No   | No        |             |
| Alcohol Dependence, N(%)                    | 22.1              | -0.16               | P < 0.0001 | No   | No        |             |
| Allopurinol, N(%)                           | 5.9               | 0.08                | P < 0.0001 | Yes  | No        |             |
| Alphablocker, N(%)                          | 27.3              | -0.13               | P < 0.0001 | Yes  | No        |             |
| Antianginal, N(%)                           | 8.0               | -0.1                | P < 0.0001 | No   | No        |             |
| Antiarrhythmic, N(%)                        | 2.3               | -0.13               | P < 0.0001 | Yes  | No        |             |
| Antibiotic, N(%)                            | 41.1              | -0.21               | P < 0.0001 | Yes  | No        |             |

|                                                        |      |       |            |     |     |         |
|--------------------------------------------------------|------|-------|------------|-----|-----|---------|
| Anticoagulant Inpatient, N(%)                          | 14.3 | -0.14 | P < 0.0001 | Yes | No  |         |
| Anticoagulant Outpatient, N(%)                         | 15.3 | -0.09 | P < 0.0001 | No  | No  |         |
| Antihistamine, N(%)                                    | 40.3 | -0.14 | P < 0.0001 | No  | No  |         |
| Antipsychotic, N(%)                                    | 9.5  | -0.23 | P < 0.0001 | Yes | No  |         |
| Antiviral, N(%)                                        | 8.3  | -0.05 | P < 0.0001 | No  | No  |         |
| Anxiety, N(%)                                          | 21.9 | -0.1  | P < 0.0001 | No  | No  |         |
| Angiotensin II Receptor Blocker, N(%)                  | 12.7 | 0.03  | P < 0.0001 | No  | No  |         |
| Acute Respiratory Distress Syndrome, N(%)              | < 1% |       | P > 0.05   | No  | No  |         |
| Aromatase Inhibitors, N(%)                             | < 1% |       | P > 0.05   | No  | No  |         |
| Asthma, N(%)                                           | 6.7  | 0     | P > 0.05   | No  | No  |         |
| Azithromycin, N(%)                                     | 10.1 | -0.02 | P < 0.0001 | Yes | No  |         |
| Bacillus Calmette-Guerin, N(%)                         | < 1% |       | P > 0.05   | No  | No  |         |
| Benzodiazepine, N(%)                                   | 12.2 | -0.26 | P < 0.0001 | Yes | No  |         |
| Beta Agonist Nebulizer, N(%)                           | 9.6  | -0.16 | P < 0.0001 | Yes | No  |         |
| Beta Blocker, N(%)                                     | 31.8 | -0.12 | P < 0.0001 | Yes | No  |         |
| Bipolar Disorder, N(%)                                 | 4.5  | -0.31 | P < 0.0001 | Yes | No  |         |
| Bronchitis, N(%)                                       | 7.1  | -0.04 | P < 0.0001 | Yes | No  |         |
| Bronchodilator, N(%)                                   | 24.5 | -0.17 | P < 0.0001 | No  | No  |         |
| Coronary Atherosclerosis and other Heart Disease, N(%) | 19.7 | -0.06 | P < 0.0001 | Yes | No  |         |
| Cancer, N(%)                                           | 21.0 | -0.3  | P < 0.0001 | Yes | Yes | -0.3253 |
| Cardiomyopathy, N(%)                                   | 3.5  | -0.17 | P < 0.0001 | Yes | No  |         |
| Calcium Channel Blocker, N(%)                          | 24.9 | -0.08 | P < 0.0001 | No  | No  |         |
| Cerebrovascular Disease, N(%)                          | 2.0  | -0.02 | P > 0.05   | No  | No  |         |
| Congestive Heart Failure, N(%)                         | 7.8  | -0.08 | P < 0.0001 | Yes | No  |         |
| Chloroquine, N(%)                                      | < 1% |       | P > 0.05   | No  | No  |         |
| Chronic hepatitis, N(%)                                | < 1% |       | P > 0.05   | No  | No  |         |
| Chronic Lung Disease, N(%)                             | 32.0 | -0.18 | P < 0.0001 | Yes | No  |         |
| Chronic Neurological Disease, N(%)                     | 3.4  | 0.07  | P < 0.0001 | Yes | No  |         |
| Chronic Rheumatic Heart Disease, N(%)                  | < 1% |       | P > 0.05   | No  | No  |         |
| Cirrhosis, N(%)                                        | 2.6  | -0.37 | P < 0.0001 | Yes | No  |         |
| Cis-atracurium, N(%)                                   | < 1% |       | P > 0.05   | No  | No  |         |
| Chronic Kidney Disease, N(%)                           | 13.0 | 0.03  | P < 0.0001 | Yes | No  |         |
| Chronic Kidney Failure, N(%)                           | 1.5  | 0.06  | 0.0021     | No  | No  |         |
| Colchicine, N(%)                                       | 2.4  | 0     | P > 0.05   | No  | No  |         |
| Complex Sleep Apnea, N(%)                              | < 1% |       | P > 0.05   | No  | No  |         |
| Chronic Obstructive Pulmonary Disease, N(%)            | 17.7 | -0.24 | P < 0.0001 | No  | No  |         |
| Corticosteroid, N(%)                                   | 36.4 | -0.14 | P < 0.0001 | Yes | No  |         |
| Central Sleep Apnea Primary, N(%)                      | < 1% |       | P > 0.05   | No  | No  |         |
| Central Serous Retinopathy, N(%) (CRS)                 | < 1% |       | P > 0.05   | No  | No  |         |
| Cardiovascular Disease, N(%)                           | 33.3 | -0.12 | P < 0.0001 | Yes | No  |         |



|                                                            |      |       |            |     |     |        |
|------------------------------------------------------------|------|-------|------------|-----|-----|--------|
| Degarelix, N(%)                                            | < 1% |       | P > 0.05   | No  | No  | 0.3506 |
| Dementia, N(%)                                             | 4.2  | 0.38  | P < 0.0001 | Yes | Yes |        |
| Dexamethasone, N(%)                                        | 3.7  | -0.17 | P < 0.0001 | No  | No  |        |
| Diabetes Any, N(%)                                         | 31.0 | 0.11  | P < 0.0001 | Yes | Yes |        |
| Diabetes Other, N(%)                                       | 3.1  | -0.03 | P = 0.0029 | Yes | Yes |        |
| Diabetes Type 1, N(%)                                      | 1.7  | 0     | P > 0.05   | No  | No  |        |
| Diabetes Type 2, N(%)                                      | 30.8 | 0.11  | P < 0.0001 | Yes | No  |        |
| Diabetes With Complications, N(%)                          | 21.9 | 0.09  | P < 0.0001 | No  | No  |        |
| Diabetes Without Complications, N(%)                       | 27.9 | 0.11  | P < 0.0001 | No  | No  |        |
| Dobutamine, N(%)                                           | < 1% |       | P > 0.05   | No  | No  |        |
| Non-Alcohol Drug Dependence, N(%)                          | 6.1  | -0.49 | P < 0.0001 | Yes | Yes |        |
| Eculizumab, N(%)                                           | < 1% |       | P > 0.05   | No  | No  |        |
| Emphysema, N(%)                                            | 2.1  | -0.33 | P < 0.0001 | Yes | No  |        |
| Epinephrine, N(%)                                          | 2.6  | -0.11 | P < 0.0001 | Yes | No  |        |
| Estrogen, N(%)                                             | 2.1  | -0.09 | P < 0.0001 | Yes | No  |        |
| Famotidine, N(%)                                           | 8.3  | -0.12 | P < 0.0001 | No  | No  |        |
| Furosemide, N(%)                                           | 11.4 | -0.06 | P < 0.0001 | No  | No  |        |
| Guillain-Barre Syndrome, N(%)                              | < 1% |       | P > 0.05   | No  | No  |        |
| Glucocorticoid, N(%)                                       | 22.4 | -0.13 | P < 0.0001 | No  | No  |        |
| Histamine 2 Receptor Blocker, N(%)                         | 8.6  | -0.19 | P < 0.0001 | Yes | No  |        |
| Hydrochlorothiazide, N(%)                                  | 15.1 | -0.03 | P = 0.0024 | No  | No  |        |
| Heart Disease, N(%)                                        | 24.6 | -0.07 | P < 0.0001 | Yes | No  |        |
| Heart Failure, N(%)                                        | 9.7  | -0.06 | P < 0.0001 | No  | No  |        |
| Hemorrhagic Stroke, N(%)                                   | < 1% |       | P > 0.05   | No  | No  |        |
| Human Immunodeficiency Virus, N(%)                         | < 1% |       | P > 0.05   | No  | No  |        |
| Hypertension, N(%)                                         | 59.4 | -0.04 | P = 0.0033 | Yes | No  |        |
| Hydroxychloroquine, N(%)                                   | < 1% |       | P > 0.05   | No  | No  |        |
| Hyperlipidemia, N(%)                                       | 55.7 | 0.03  | P < 0.0001 | Yes | No  |        |
| Inflammatory bowel Disease, N(%)                           | 3.3  | -0.16 | P < 0.0001 | Yes | No  |        |
| Inhaled Corticosteroids, N(%)                              | 2.0  | -0.12 | P < 0.0001 | Yes | No  |        |
| Inhaled Corticosteroids and Long-Acting Beta-Agonist, N(%) | 10.8 | -0.15 | P < 0.0001 | Yes | No  |        |
| Induction Ventilation Medications, N(%)                    | 1.9  | -0.25 | P < 0.0001 | No  | No  |        |
| Influenza, N(%)                                            | 1.9  | 0.09  | P < 0.0001 | Yes | No  |        |
| Inhaled Budesonide, N(%)                                   | < 1% |       | P > 0.05   | No  | No  |        |
| Inhaled Epo-prostenol, N(%)                                | < 1% |       | P > 0.05   | No  | No  |        |
| Ischemic Stroke, N(%)                                      | 4.7  | -0.01 | P > 0.05   | No  | No  |        |
| Isoproterenol, N(%)                                        | < 1% |       | P > 0.05   | No  | No  |        |
| Kidney Disease All, N(%)                                   | 21.8 | -0.03 | P < 0.0001 | Yes | No  |        |
| Long-Acting Beta-Agonist, N(%)                             | < 1% |       | P > 0.05   | No  | No  |        |
| Liver Disease, N(%)                                        | 7.2  | -0.16 | P < 0.0001 | Yes | No  |        |
| Lopinavir, N(%)                                            | < 1% |       | P > 0.05   | No  | No  |        |

|                                                     |      |       |            |     |     |         |
|-----------------------------------------------------|------|-------|------------|-----|-----|---------|
| Losartan, N(%)                                      | 11.4 | 0.03  | P < 0.0001 | No  | No  |         |
| Lower Respiratory Infection, N(%)                   | 7.9  | 0.13  | P < 0.0001 | Yes | Yes | 0.0888  |
| Major Depressive Disorder, N(%)                     | 34.6 | -0.13 | P < 0.0001 | Yes | No  |         |
| Measles, N(%)                                       | < 1% |       | P > 0.05   | No  | No  |         |
| Metformin, N(%)                                     | 18.5 | 0.11  | P < 0.0001 | Yes | No  |         |
| Milrinone, N(%)                                     | < 1% |       | P > 0.05   | No  | No  |         |
| Multiple Sclerosis, N(%)                            | < 1% |       | P > 0.05   | No  | No  |         |
| Nephrosis, N(%)                                     | 2.8  | 0     | P > 0.05   | No  | No  |         |
| Norepinephrine, N(%)                                | < 1% |       | P > 0.05   | No  | No  |         |
| Non-steroidal Anti-Inflammatory Drug, N(%)          | 59.0 | -0.15 | P < 0.0001 | Yes | No  |         |
| Obesity Hypoventilation, N(%)                       | < 1% |       | P > 0.05   | No  | No  |         |
| Opioid, N(%)                                        | 5.6  | -0.3  | P < 0.0001 | Yes | No  |         |
| Obstructive Sleep Apnea, N(%)                       | 29.5 | 0.05  | P < 0.0001 | No  | No  |         |
| Other and Ill-Defined Heart Disease, N(%)           | 2.9  | -0.07 | P < 0.0001 | No  | No  |         |
| Overweight, N(%)                                    | 6.5  | 0.27  | P < 0.0001 | Yes | No  |         |
| Peripheral Artery Disease, N(%)                     | 11.8 | -0.19 | P < 0.0001 | Yes | No  |         |
| Platelet Aggregation Inhibitor, N(%)                | 6.7  | -0.06 | P < 0.0001 | Yes | No  |         |
| Parkinsons Disease, N(%)                            | 1.2  | 0.12  | P < 0.0001 | Yes | No  |         |
| Polycystic Ovary Syndrome, N(%)                     | < 1% |       | P > 0.05   | No  | No  |         |
| Phenylephrine, N(%)                                 | 1.8  | -0.27 | P < 0.0001 | Yes | No  | -0.2799 |
| Pneumonia, N(%)                                     | 5.4  | 0.12  | P < 0.0001 | Yes | No  | 0.1790  |
| Ventilator-Associated Pneumonia, N(%)               | < 1% |       | P > 0.05   | No  | No  |         |
| Proton Pump Inhibitor, N(%)                         | 36.1 | -0.15 | P < 0.0001 | Yes | No  |         |
| Pregnancy, N(%)                                     | < 1% |       | P > 0.05   | No  | No  |         |
| Pregnancy at Index, N(%)                            | < 1% |       | P > 0.05   | No  | No  |         |
| Posttraumatic Stress Disorder, N(%)                 | 25.1 | -0.1  | P < 0.0001 | No  | No  |         |
| Pulmonary Heart Disease, N(%)                       | 2.1  | -0.12 | P < 0.0001 | Yes | Yes |         |
| Remdesivir, N(%)                                    | < 1% |       | P > 0.05   | No  | No  |         |
| Ribavirin, N(%)                                     | < 1% |       | P > 0.05   | No  | No  |         |
| Rosiglitazone, N(%)                                 | < 1% |       | P > 0.05   | No  | No  |         |
| Sarilumab, N(%)                                     | < 1% |       | P > 0.05   | No  | No  |         |
| Schizophrenia, N(%)                                 | 2.7  | -0.23 | P < 0.0001 | Yes | No  |         |
| Septic Shock, N(%)                                  | 2.5  | 0.12  | P < 0.0001 | Yes | Yes | 0.0675  |
| Selective Estrogen Receptor Degradar, N(%)          | < 1% |       | P > 0.05   | No  | No  |         |
| Selective Estrogen Receptor Modulators, N(%)        | < 1% |       | P > 0.05   | No  | No  |         |
| Sickle Cell Disease, N(%)                           | < 1% |       | P > 0.05   | No  | No  |         |
| Sleep Related Non-Obstructive Hypoventilation, N(%) | < 1% |       | P > 0.05   | No  | No  |         |
| Never Smoker                                        | 36.7 | 0.28  | P < 0.0001 | Yes | No  |         |
| Former Smoker                                       | 43.0 | 0.09  | P < 0.0001 | No  | No  | -0.1203 |
| Current Smoker                                      | 20.2 | -0.63 | P < 0.0001 | Yes | Yes | -0.6828 |

|                                                        |      |       |            |     |    |
|--------------------------------------------------------|------|-------|------------|-----|----|
| Serotonin and Norepinephrine Reuptake Inhibitors, N(%) | 13.8 | -0.16 | P < 0.0001 | Yes | No |
| Spleen Removed, N(%)                                   | < 1% |       | P > 0.05   | No  | No |
| Selective Serotonin Reuptake Inhibitors, N(%)          | 20.1 | -0.09 | P < 0.0001 | No  | No |
| Statin, N(%)                                           | 48.4 | -0.09 | P < 0.0001 | Yes | No |
| Tested positive, N(%)                                  | 19.6 |       | P < 0.0001 | No  |    |
| Tocilizumab, N(%)                                      | < 1% |       | P > 0.05   | No  | No |
| Tricyclic, N(%)                                        | 4.7  | -0.17 | P < 0.0001 | Yes | No |
| Urinary Stones, N(%)                                   | 9.7  | -0.13 | P < 0.0001 | Yes | No |
| Valsartan, N(%)                                        | 1.5  | -0.01 | P > 0.05   | No  | No |
| Vasopressin, N(%)                                      | < 1% |       | P > 0.05   | No  | No |
| Vasopressor, N(%)                                      | 2.1  | -0.15 | P < 0.0001 | Yes | No |
| Vecuronium, N(%)                                       | < 1% |       | P > 0.05   | No  | No |
| Venous Thromboembolism, N(%)                           | 2.5  | -0.01 | P > 0.05   | No  | No |

**Table S2b.** List of variables studied and results of feature selection (FS) from prevalence, Univariate Analysis, LASSO, and sequential forward stepwise selection for Unimputed data.

| Variables                                   | Prevalence (%) | Univariate Analysis |            | LASSO | Forward Selection | Logistic regression Coefficient |
|---------------------------------------------|----------------|---------------------|------------|-------|-------------------|---------------------------------|
|                                             |                | Beta                | pValue     | O     |                   |                                 |
|                                             |                |                     |            |       |                   |                                 |
| Sex (Male)                                  | 89.0           |                     | P < 0.0001 | Yes   | No                |                                 |
| Age                                         |                |                     |            |       |                   |                                 |
| Age 18–30                                   | 2.7            |                     | P < 0.0001 | Yes   | No                |                                 |
| Age 30–40                                   | 9.6            |                     | P < 0.0001 | Yes   | No                |                                 |
| Age 40–50                                   | 9.8            |                     | P < 0.0001 | Yes   | No                |                                 |
| Age 50–65                                   | 28.6           |                     | P < 0.0001 | No    | No                |                                 |
| Age 65–75                                   | 31.9           |                     | P < 0.0001 | Yes   | No                |                                 |
| Age 75–85                                   | 12.9           |                     | P < 0.0001 | No    | No                |                                 |
| Age > 85                                    | 4.5            |                     | P < 0.0001 | Yes   | Yes               | 0.2836                          |
| Race                                        |                |                     |            |       |                   |                                 |
| White                                       | 68.3           |                     | P < 0.0001 | Yes   | No                |                                 |
| Black                                       | 22.5           |                     | P > 0.05   | No    | No                |                                 |
| Other                                       | 9.3            |                     | P < 0.0001 | No    | No                |                                 |
| Ethnicity                                   |                |                     |            |       |                   |                                 |
| Hispanic or Latino, N(%)                    | 8.4            |                     | P < 0.0001 | Yes   | No                |                                 |
| BMI                                         |                |                     |            |       |                   |                                 |
| BMI < 18.5                                  | 1.5            |                     | P < 0.0001 | Yes   | Yes               | -0.3154                         |
| 18.5 ≤ BMI <30                              | 52.7           |                     | P < 0.0001 | No    | No                |                                 |
| BMI ≥ 30                                    | 45.8           |                     | P < 0.0001 | Yes   | Yes               | 0.2726                          |
| Acetyl Cholinesterase (ACE) Inhibitor, N(%) | 29.2           |                     | P < 0.0001 | Yes   | No                |                                 |
| Acetaminophen, N(%)                         | 40.1           |                     | P < 0.0001 | Yes   | No                |                                 |
| Acute Cardiac Injury, N(%)                  | 2.4            |                     | P < 0.0001 | Yes   | No                |                                 |
| Acute Liver Injury, N(%)                    | < 1%           |                     | P > 0.05   | No    | No                |                                 |
| Acute Myocardial Infarction, N(%)           | 2.4            |                     | P < 0.0001 | No    | No                |                                 |
| Acute Respiratory Failure, N(%)             | 5.1            |                     | P > 0.05   | No    | No                |                                 |
| Acute Rheumatic Heart Disease, N(%)         | < 1%           |                     | P > 0.05   | No    | No                |                                 |
| Androgen deprivation therapy, N(%)          | 1.2            |                     | P < 0.0001 | Yes   | No                |                                 |
| Acute Kidney Failure, N(%)                  | 7.5            |                     | P = 0.091  | No    | No                |                                 |
| Albumin, N(%)                               | < 1%           |                     | P > 0.05   | No    | No                |                                 |
| Alcohol Dependence, N(%)                    | 23.8           |                     | P < 0.0001 | No    | No                |                                 |
| Allopurinol, N(%)                           | 6.3            |                     | P < 0.0001 | Yes   | No                |                                 |
| Alphablocker, N(%)                          | 29.4           |                     | P < 0.0001 | No    | No                |                                 |
| Antianginal, N(%)                           | 8.6            |                     | P < 0.0001 | No    | No                |                                 |
| Antiarrhythmic, N(%)                        | 2.5            |                     | P < 0.0001 | No    | No                |                                 |
| Antibiotic, N(%)                            | 43.8           |                     | P < 0.0001 | Yes   | Yes               |                                 |

|                                                        |      |            |     |     |         |
|--------------------------------------------------------|------|------------|-----|-----|---------|
| Anticoagulant Inpatient, N(%)                          | 15.1 | P < 0.0001 | No  | No  | -0.3232 |
| Anticoagulant Outpatient, N(%)                         | 16.5 | P < 0.0001 | Yes | No  |         |
| Antihistamine, N(%)                                    | 43.2 | P < 0.0001 | No  | No  |         |
| Antipsychotic, N(%)                                    | 10.1 | P < 0.0001 | Yes | No  |         |
| Antiviral, N(%)                                        | 8.6  | P < 0.0001 | No  | No  |         |
| Anxiety, N(%)                                          | 23.5 | P < 0.0001 | No  | No  |         |
| Angiotensin II Receptor Blocker, N(%)                  | 13.7 | P < 0.0001 | No  | No  |         |
| Acute Respiratory Distress Syndrome, N(%)              | < 1% | P > 0.05   | No  | No  |         |
| Aromatase Inhibitors, N(%)                             | < 1% | P > 0.05   | No  | No  |         |
| Asthma, N(%)                                           | 7.2  | P > 0.05   | No  | No  |         |
| Azithromycin, N(%)                                     | 10.8 | P < 0.0001 | Yes | No  |         |
| Bacillus Calmette-Guerin, N(%)                         | < 1% | P > 0.05   | No  | No  |         |
| Benzodiazepine, N(%)                                   | 13.1 | P < 0.0001 | Yes | No  |         |
| Beta Agonist Nebulizer, N(%)                           | 10.2 | P < 0.0001 | Yes | No  |         |
| Beta Blocker, N(%)                                     | 34.1 | P < 0.0001 | Yes | No  |         |
| Bipolar Disorder, N(%)                                 | 4.8  | P < 0.0001 | Yes | No  |         |
| Bronchitis, N(%)                                       | 7.7  | P < 0.0001 | Yes | No  |         |
| Bronchodilator, N(%)                                   | 26.4 | P < 0.0001 | No  | No  |         |
| Coronary Atherosclerosis and other Heart Disease, N(%) | 21.2 | P < 0.0001 | Yes | No  |         |
| Cancer, N(%)                                           | 22.5 | P < 0.0001 | Yes | Yes |         |
| Cardiomyopathy, N(%)                                   | 3.8  | P < 0.0001 | Yes | No  |         |
| Calcium Channel Blocker, N(%)                          | 26.8 | P < 0.0001 | No  | No  |         |
| Cerebrovascular Disease, N(%)                          | 2.2  | P = 0.0006 | No  | No  | -0.3232 |
| Congestive Heart Failure, N(%)                         | 8.3  | P < 0.0001 | Yes | No  |         |
| Chloroquine, N(%)                                      | < 1% | P > 0.05   | No  | No  |         |
| Chronic hepatitis, N(%)                                | < 1% | P > 0.05   | No  | No  |         |
| Chronic Lung Disease, N(%)                             | 34.5 | P < 0.0001 | Yes | No  |         |
| Chronic Neurological Disease, N(%)                     | 3.6  | P < 0.0001 | Yes | No  |         |
| Chronic Rheumatic Heart Disease, N(%)                  | 1.0  | P > 0.05   | Yes | No  |         |
| Cirrhosis, N(%)                                        | 2.7  | P < 0.0001 | Yes | No  |         |
| Cis-atracurium, N(%)                                   | < 1% | P > 0.05   | No  | No  |         |
| Chronic Kidney Disease, N(%)                           | 13.9 | P < 0.0001 | Yes | No  |         |
| Chronic Kidney Failure, N(%)                           | 1.6  | P > 0.05   | No  | No  |         |
| Colchicine, N(%)                                       | 2.6  | P > 0.05   | No  | No  |         |
| Complex Sleep Apnea, N(%)                              | < 1% | P > 0.05   | No  | No  |         |
| Chronic Obstructive Pulmonary Disease, N(%)            | 19.1 | P < 0.0001 | No  | No  |         |
| Corticosteroid, N(%)                                   | 39.2 | P < 0.0001 | Yes | No  |         |
| Central sleep Apnea Primary, N(%)                      | < 1% | P > 0.05   | No  | No  |         |
| Central serous retinopathy, N(%)                       | < 1% | P > 0.05   | No  | No  |         |
| Cardiovascular Disease, N(%)                           | 35.7 | P < 0.0001 | Yes | No  |         |

|                                                            |      |             |     |     |        |
|------------------------------------------------------------|------|-------------|-----|-----|--------|
| Degarelix, N(%)                                            | < 1% | P > 0.05    | No  | No  | 0.3496 |
| Dementia, N(%)                                             | 4.2  | P < 0.0001  | Yes | Yes |        |
| Dexamethasone, N(%)                                        | 3.9  | P < 0.0001  | No  | No  |        |
| Diabetes Any, N(%)                                         | 33.2 | P < 0.0001  | Yes | No  | 0.3496 |
| Diabetes Other, N(%)                                       | 3.3  | P = 0.0006  | Yes | No  |        |
| Diabetes Type 1, N(%)                                      | 1.9  | P > 0.05    | No  | No  |        |
| Diabetes Type 2, N(%)                                      | 33.0 | P < 0.0001  | Yes | No  | 0.3496 |
| Diabetes With Complications, N(%)                          | 23.5 | P < 0.0001  | No  | No  |        |
| Diabetes Without Complications, N(%)                       | 30.0 | P < 0.0001  | No  | No  |        |
| Dobutamine, N(%)                                           | < 1% | P > 0.05    | No  | No  | 0.3496 |
| Non-Alcohol Drug Dependence, N(%)                          | 6.5  | P < 0.0001  | Yes | No  |        |
| Ecilizumab, N(%)                                           | < 1% | P > 0.05    | No  | No  |        |
| Emphysema, N(%)                                            | 2.3  | P < 0.0001  | No  | No  | 0.3496 |
| Epinephrine, N(%)                                          | 2.8  | P < 0.0001  | Yes | No  |        |
| Estrogen, N(%)                                             | 2.2  | P < 0.0001  | No  | No  |        |
| Famotidine, N(%)                                           | 8.9  | P < 0.0001  | No  | No  | 0.3496 |
| Furosemide, N(%)                                           | 12.1 | P < 0.0001  | No  | No  |        |
| Guillain-Barre Syndrome, N(%)                              | < 1% | P > 0.05    | No  | No  |        |
| Glucocorticoid, N(%)                                       | 23.9 | P < 0.0001  | No  | No  | 0.3496 |
| Histamine 2 Receptor Blocker, N(%)                         | 9.2  | P < 0.0001  | Yes | No  |        |
| Hydrochlorothiazide, N(%)                                  | 16.3 | P = 0.0016  | No  | No  |        |
| Heart Disease, N(%)                                        | 26.4 | P < 0.0001  | Yes | No  | 0.3496 |
| Heart Failure, N(%)                                        | 10.3 | P < 0.0001  | No  | No  |        |
| Hemorrhagic Stroke, N(%)                                   | < 1% | P > 0.05    | No  | No  |        |
| Human Immunodeficiency Virus, N(%)                         | < 1% | P > 0.05    | No  | No  | 0.3496 |
| Hypertension, N(%)                                         | 63.9 | P < 0.0001  | Yes | No  |        |
| Hydroxychloroquine, N(%)                                   | < 1% | P > 0.05    | No  | No  |        |
| Hyperlipidemia, N(%)                                       | 60.3 | P < 0.0001  | Yes | No  | 0.3496 |
| Inflammatory bowel Disease, N(%)                           | 3.6  | P < 0.0001  | Yes | No  |        |
| Inhaled Corticosteroids, N(%)                              | 2.2  | P < 0.0001  | Yes | No  |        |
| Inhaled Corticosteroids and Long-Acting Beta-Agonist, N(%) | 11.7 | P < 0.0001  | Yes | No  | 0.3496 |
| Induction Ventilation Medications, N(%)                    | 2.0  | P < 0.0001  | No  | No  |        |
| Influenza, N(%)                                            | 2.0  | P = 0.00012 | Yes | No  |        |
| Inhaled Budesonide, N(%)                                   | < 1% | P > 0.05    | No  | No  | 0.3496 |
| Inhaled Epo-prostenol, N(%)                                | < 1% | P > 0.05    | No  | No  |        |
| Ischemic Stroke, N(%)                                      | 4.9  | P = 0.0003  | Yes | No  |        |
| Isoproterenol, N(%)                                        | < 1% | P > 0.05    | No  | No  | 0.3496 |
| Kidney Disease All, N(%)                                   | 23.3 | P < 0.0001  | Yes | No  |        |
| Long-Acting Beta-Agonist, N(%)                             | < 1% | P > 0.05    | No  | No  |        |
| Liver Disease, N(%)                                        | 7.7  | P < 0.0001  | Yes | No  | 0.3496 |

|                                                     |      |            |     |     |         |
|-----------------------------------------------------|------|------------|-----|-----|---------|
| Lopinavir, N(%)                                     | < 1% | P > 0.05   | No  | No  |         |
| Losartan, N(%)                                      | 12.4 | P < 0.0001 | No  | No  |         |
| Lower Respiratory Infection, N(%)                   | 8.4  | P < 0.0001 | Yes | Yes | 0.0907  |
| Major Depressive Disorder, N(%)                     | 37.1 | P < 0.0001 | Yes | No  |         |
| Measles, N(%)                                       | < 1% | P > 0.05   | No  | No  |         |
| Metformin, N(%)                                     | 20.0 | P < 0.0001 | Yes | No  |         |
| Milrinone, N(%)                                     | < 1% | P > 0.05   | No  | No  |         |
| Multiple Sclerosis, N(%)                            | < 1% | P > 0.05   | No  | No  |         |
| Nephrosis, N(%)                                     | 3.0  | P > 0.05   | No  | No  |         |
| Norepinephrine, N(%)                                | < 1% | P > 0.05   | No  | No  |         |
| Non-steroidal Anti-Inflammatory Drug, N(%)          | 63.0 | P < 0.0001 | Yes | No  |         |
| Obesity Hypoventilation, N(%)                       | < 1% | P > 0.05   | No  | No  |         |
| Opioid, N(%)                                        | 6.0  | P < 0.0001 | Yes | No  |         |
| Obstructive Sleep Apnea, N(%)                       | 31.8 | P < 0.0001 | No  | No  |         |
| Other and Ill-Defined Heart Disease, N(%)           | 3.1  | P < 0.0001 | No  | No  |         |
| Overweight, N(%)                                    | 6.8  | P < 0.0001 | Yes | No  |         |
| Peripheral Artery Disease, N(%)                     | 12.7 | P < 0.0001 | Yes | No  |         |
| Platelet Aggregation Inhibitor, N(%)                | 7.2  | P < 0.0001 | Yes | No  |         |
| Parkinsons Disease, N(%)                            | 1.3  | P < 0.0001 | Yes | No  |         |
| Polycystic Ovary Syndrome, N(%)                     | < 1% | P > 0.05   | No  | No  |         |
| Phenylephrine, N(%)                                 | 1.9  | P < 0.0001 | Yes | Yes | -0.2779 |
| Pneumonia, N(%)                                     | 5.7  | P < 0.0001 | Yes | Yes | 0.1789  |
| Ventilator-Associated Pneumonia, N(%)               | < 1% | P > 0.05   | No  | No  |         |
| Proton Pump Inhibitor, N(%)                         | 38.9 | P < 0.0001 | Yes | No  |         |
| Pregnancy, N(%)                                     | 0.4  | P > 0.05   | No  | No  |         |
| Pregnancy at Index, N(%)                            | < 1% | P > 0.05   | No  | No  |         |
| Posttraumatic Stress Disorder, N(%)                 | 26.9 | P < 0.0001 | No  | No  |         |
| Pulmonary Heart Disease, N(%)                       | 2.2  | P < 0.0001 | Yes | No  |         |
| Remdesivir, N(%)                                    | < 1% | P > 0.05   | No  | No  |         |
| Ribavirin, N(%)                                     | < 1% | P > 0.05   | No  | No  |         |
| Rosiglitazone, N(%)                                 | < 1% | P > 0.05   | No  | No  |         |
| Sarilumab, N(%)                                     | < 1% | P > 0.05   | No  | No  |         |
| Schizophrenia, N(%)                                 | 2.8  | P < 0.0001 | Yes | No  |         |
| Septic Shock, N(%)                                  | 2.6  | P < 0.0001 | Yes | Yes | 0.0652  |
| Selective Estrogen Receptor Degradar, N(%)          | < 1% | P > 0.05   | No  | No  |         |
| Selective Estrogen Receptor Modulators, N(%)        | < 1% | P > 0.05   | No  | No  |         |
| Sickle Cell Disease, N(%)                           | < 1% | P > 0.05   | No  | No  |         |
| Sleep Related Non-Obstructive Hypoventilation, N(%) | < 1% | P > 0.05   | No  | No  |         |
| Never Smoker                                        | 36.0 | P < 0.0001 | Yes | No  |         |
| Former Smoker                                       | 43.1 | P < 0.0001 | No  | No  | -0.1098 |
| Current Smoker                                      | 20.9 | P < 0.0001 | Yes | Yes | -0.6943 |

|                                                        |      |            |     |    |
|--------------------------------------------------------|------|------------|-----|----|
| Serotonin and Norepinephrine Reuptake Inhibitors, N(%) | 14.9 | P < 0.0001 | Yes | No |
| Spleen Removed, N(%)                                   | < 1% | P > 0.05   | No  | No |
| Selective Serotonin Reuptake Inhibitors, N(%)          | 21.5 | P < 0.0001 | No  | No |
| Statin, N(%)                                           | 52.3 | P < 0.0001 | Yes | No |
| Tested positive, N(%)                                  | 19.5 | P < 0.0001 | No  | No |
| Tocilizumab, N(%)                                      | < 1% | P > 0.05   | No  | No |
| Tricyclic, N(%)                                        | 5.1  | P < 0.0001 | Yes | No |
| Urinary Stones, N(%)                                   | 10.4 | P < 0.0001 | Yes | No |
| Valsartan, N(%)                                        | 1.6  | P > 0.05   | No  | No |
| Vasopressin, N(%)                                      | < 1% | P > 0.05   | No  | No |
| Vasopressor, N(%)                                      | 2.2  | P < 0.0001 | Yes | No |
| Vecuronium, N(%)                                       | < 1% | P > 0.05   | No  | No |
| Venous Thromboembolism, N(%)                           | 2.7  | P = 0.046  | Yes | No |



**Table S3.** Prevalence of patient characteristics by testing status

| Variables                                              | Tested Negative<br>n= 946,056 (80.4%) | Tested Positive<br>n= 230,250 (19.6%) |
|--------------------------------------------------------|---------------------------------------|---------------------------------------|
| Sex (Male)                                             | 816322. (86.3)                        | 201077. (87.3)                        |
| Race                                                   |                                       |                                       |
| White                                                  | 620336. (65.6)                        | 150134. (65.2)                        |
| Black                                                  | 205536. (21.7)                        | 49658. (21.6)                         |
| Others                                                 | 120184. (12.7)                        | 30458. (13.2)                         |
| Ethnicity                                              |                                       |                                       |
| Not Hispanic Or Latino                                 | 806525. (85.3)                        | 192428. (83.6)                        |
| Hispanic Or Latino                                     | 74221. (7.8)                          | 22124. (9.6)                          |
| Unknown                                                | 65310. (6.9)                          | 15698. (6.8)                          |
| Age [Mean, SD]                                         |                                       |                                       |
| Age 18–30                                              | 41230. (4.4)                          | 11148. (4.8)                          |
| Age 30–40                                              | 102685. (10.9)                        | 27340. (11.9)                         |
| Age 40–50                                              | 101603. (10.7)                        | 28539. (12.4)                         |
| Age 50–65                                              | 277380. (29.3)                        | 63293. (27.5)                         |
| Age 65–75                                              | 291438. (30.8)                        | 63142. (27.4)                         |
| Age 75–85                                              | 97509. (10.3)                         | 25179. (10.9)                         |
| Age > 85                                               | 34210. (3.6)                          | 11609. (5.0)                          |
| BMI [Mean, SD]                                         |                                       |                                       |
| BMI < 18.5                                             | 15266. (1.6)                          | 2253. (1.0)                           |
| 18.5 ≤ BMI <30                                         | 517919. (54.7)                        | 110634. (48.0)                        |
| BMI ≥ 30                                               | 412871. (43.6)                        | 117363. (51.0)                        |
| <b>Pre-existing Conditions</b>                         |                                       |                                       |
| Acute Cardiac Injury, N(%)                             | 21745. (2.3)                          | 5003. (2.2)                           |
| Acute Liver Injury, N(%)                               | 1950. (0.2)                           | 343. (0.1)                            |
| Acute Myocardial Infarction, N(%)                      | 21699. (2.3)                          | 4993. (2.2)                           |
| Acute Respiratory Failure, N(%)                        | 45619. (4.8)                          | 11443. (5.0)                          |
| Acute Rheumatic Heart Disease, N(%)                    | 53. (0.0)                             | 9. (0.0)                              |
| Acute Kidney Failure, N(%)                             | 67036. (7.1)                          | 16318. (7.1)                          |
| Alcohol Dependence, N(%)                               | 214249. (22.6)                        | 45535. (19.8)                         |
| Anxiety, N(%)                                          | 210951. (22.3)                        | 47013. (20.4)                         |
| Acute Respiratory Distress Syndrome, N(%)              | 552. (0.1)                            | 248. (0.1)                            |
| Asthma, N(%)                                           | 63349. (6.7)                          | 15274. (6.6)                          |
| Bipolar Disorder, N(%)                                 | 45105. (4.8)                          | 7957. (3.5)                           |
| Breastfeeding, N(%)                                    | 670. (0.1)                            | 209. (0.1)                            |
| Breastfeed At Index                                    | 14. (0.0)                             | 4. (0.0)                              |
| Bronchitis, N(%)                                       | 68086. (7.2)                          | 15691. (6.8)                          |
| Coronary Atherosclerosis and other Heart Disease, N(%) | 187437. (19.8)                        | 43765. (19.0)                         |
| Cancer, N(%)                                           | 207470. (21.9)                        | 39182. (17.0)                         |
| Cardiomyopathy, N(%)                                   | 34151. (3.6)                          | 6968. (3.0)                           |

|                                             |                |                |
|---------------------------------------------|----------------|----------------|
| Cerebrovascular Disease, N(%)               | 19361. (2.0)   | 4532. (2.0)    |
| Congestive Heart Failure, N(%)              | 74701. (7.9)   | 16781. (7.3)   |
| Chronic hepatitis, N(%)                     | 3201. (0.3)    | 534. (0.2)     |
| Chronic Lung Disease, N(%)                  | 309740. (32.7) | 66367. (28.8)  |
| Chronic Neurological Disease, N(%)          | 32078. (3.4)   | 8296. (3.6)    |
| Chronic Rheumatic Heart Disease, N(%)       | 9166. (1.0)    | 1912. (0.8)    |
| Cirrhosis, N(%)                             | 26015. (2.7)   | 4290. (1.9)    |
| Chronic Kidney Disease, N(%)                | 122425. (12.9) | 30822. (13.4)  |
| Chronic Kidney Failure, N(%)                | 14384. (1.5)   | 3611. (1.6)    |
| Complex Sleep Apnea, N(%)                   | 162. (0.0)     | 29. (0.0)      |
| Chronic Obstructive Pulmonary Disease, N(%) | 173612. (18.4) | 34497. (15.0)  |
| Central sleep Apnea Primary, N(%)           | 3440. (0.4)    | 760. (0.3)     |
| Central serous retinopathy, N(%)            | 2141. (0.2)    | 416. (0.2)     |
| Cardiovascular Disease, N(%)                | 319657. (33.8) | 71859. (31.2)  |
| Dementia, N(%)                              | 36320. (3.8)   | 12739. (5.5)   |
| Diabetes Any, N(%)                          | 288130. (30.5) | 76563. (33.3)  |
| Diabetes Other, N(%)                        | 29557. (3.1)   | 6918. (3.0)    |
| Diabetes Type 1, N(%)                       | 16385. (1.7)   | 4000. (1.7)    |
| Diabetes Type 2, N(%)                       | 285834. (30.2) | 76017. (33.0)  |
| Diabetes With Complications, N(%)           | 203835. (21.5) | 53451. (23.2)  |
| Diabetes Without Complications, N(%)        | 259149. (27.4) | 68705. (29.8)  |
| Drug Dependence, N(%)                       | 62290. (6.6)   | 9129. (4.0)    |
| Emphysema, N(%)                             | 20877. (2.2)   | 3698. (1.6)    |
| Guillain-Barre Syndrome, N(%)               | 553. (0.1)     | 115. (0.0)     |
| Heart Disease, N(%)                         | 234426. (24.8) | 54563. (23.7)  |
| Heart Failure, N(%)                         | 92456. (9.8)   | 21187. (9.2)   |
| Hemorrhagic Stroke, N(%)                    | 2395. (0.3)    | 610. (0.3)     |
| Human Immunodeficiency Virus, N(%)          | 8895. (0.9)    | 1789. (0.8)    |
| Hypertension, N(%)                          | 562605. (59.5) | 136155. (59.1) |
| Hyperlipidemia, N(%)                        | 524911. (55.5) | 130877. (56.8) |
| Inflammatory bowel Disease, N(%)            | 32661. (3.5)   | 6698. (2.9)    |
| Influenza, N(%)                             | 17326. (1.8)   | 4564. (2.0)    |
| Ischemic Stroke, N(%)                       | 44261. (4.7)   | 10599. (4.6)   |
| Kidney Disease All, N(%)                    | 207173. (21.9) | 49216. (21.4)  |
| Liver Disease, N(%)                         | 69995. (7.4)   | 14427. (6.3)   |
| Lower Respiratory Infection, N(%)           | 73546. (7.8)   | 19666. (8.5)   |
| Major Depressive Disorder, N(%)             | 333472. (35.2) | 73817. (32.1)  |
| Measles, N(%)                               | 19. (0.0)      | 7. (0.0)       |
| Multiple Sclerosis, N(%)                    | 4108. (0.4)    | 901. (0.4)     |
| Nephrosis, N(%)                             | 26402. (2.8)   | 6359. (2.8)    |
| Obesity Hypoventilation, N(%)               | 4005. (0.4)    | 1082. (0.5)    |
| Obstructive Sleep Apnea, N(%)               | 276999. (29.3) | 70007. (30.4)  |

|                                                     |                |               |
|-----------------------------------------------------|----------------|---------------|
| Other and Ill-Defined Heart Disease, N(%)           | 28123. (3.0)   | 6277. (2.7)   |
| Overweight, N(%)                                    | 58473. (6.2)   | 18480. (8.0)  |
| Peripheral Artery Disease, N(%)                     | 115486. (12.2) | 23607. (10.3) |
| Parkinsons Disease, N(%)                            | 11431. (1.2)   | 3182. (1.4)   |
| Polycystic Ovary Syndrome, N(%)                     | 1488. (0.2)    | 364. (0.2)    |
| Pneumonia, N(%)                                     | 49597. (5.2)   | 13977. (6.1)  |
| Ventilator-Associated Pneumonia, N(%)               | 234. (0.0)     | 53. (0.0)     |
| Pregnancy, N(%)                                     | 3403. (0.4)    | 1020. (0.4)   |
| Pregnancy at Index, N(%)                            | 895. (0.1)     | 299. (0.1)    |
| Posttraumatic Stress Disorder, N(%)                 | 241243. (25.5) | 54029. (23.5) |
| Pulmonary Heart Disease, N(%)                       | 20401. (2.2)   | 4294. (1.9)   |
| Schizophrenia, N(%)                                 | 26709. (2.8)   | 5153. (2.2)   |
| Septic Shock, N(%)                                  | 23110. (2.4)   | 6304. (2.7)   |
| Sickle Cell Disease, N(%)                           | 1562. (0.2)    | 354. (0.2)    |
| Sleep Related Non-Obstructive Hypoventilation, N(%) | 3895. (0.4)    | 868. (0.4)    |
| Spleen Removed, N(%)                                | 1451. (0.2)    | 273. (0.1)    |
| Urinary Stones, N(%)                                | 94118. (9.9)   | 20188. (8.8)  |
| Venous Thromboembolism, N(%)                        | 23786. (2.5)   | 5649. (2.5)   |
| <b>Pre-infection Medications</b>                    |                |               |
| Acetyl Cholinesterase (ACE) Inhibitor, N(%)         | 258742. (27.3) | 60410. (26.2) |
| Acetaminophen, N(%)                                 | 366495. (38.7) | 77203. (33.5) |
| Androgen deprivation therapy, N(%)                  | 10769. (1.1)   | 1987. (0.9)   |
| Albumin, N(%)                                       | 6353. (0.7)    | 1270. (0.6)   |
| Allopurinol, N(%)                                   | 54674. (5.8)   | 14472. (6.3)  |
| Alphablocker, N(%)                                  | 262869. (27.8) | 58258. (25.3) |
| Antianginal, N(%)                                   | 76874. (8.1)   | 16990. (7.4)  |
| Antiarrhythmic, N(%)                                | 22298. (2.4)   | 4672. (2.0)   |
| Antibiotic, N(%)                                    | 399342. (42.2) | 84288. (36.6) |
| Anticoagulant Inpatient, N(%)                       | 139376. (14.7) | 28287. (12.3) |
| Anticoagulant Outpatient, N(%)                      | 147393. (15.6) | 33077. (14.4) |
| Antihistamine, N(%)                                 | 387554. (41.0) | 86167. (37.4) |
| Antipsychotic, N(%)                                 | 93437. (9.9)   | 17992. (7.8)  |
| Antiviral, N(%)                                     | 78971. (8.3)   | 18154. (7.9)  |
| Angiotensin II Receptor Blocker, N(%)               | 119267. (12.6) | 30096. (13.1) |
| Aromatase Inhibitors, N(%)                          | 1401. (0.1)    | 253. (0.1)    |
| Azithromycin, N(%)                                  | 96217. (10.2)  | 22343. (9.7)  |
| Bacillus Calmette-Guerin, N(%)                      | 1864. (0.2)    | 214. (0.1)    |
| Benzodiazepine, N(%)                                | 120923. (12.8) | 22619. (9.8)  |
| Beta Agonist Nebulizer, N(%)                        | 93498. (9.9)   | 19198. (8.3)  |
| Beta Blocker, N(%)                                  | 305095. (32.2) | 68591. (29.8) |
| Bronchodilator, N(%)                                | 237864. (25.1) | 50376. (21.9) |
| Calcium Channel Blocker, N(%)                       | 238232. (25.2) | 54619. (23.7) |

|                                                            |                |                |
|------------------------------------------------------------|----------------|----------------|
| Chloroquine, N(%)                                          | 15. (0.0)      | 5. (0.0)       |
| Cis-atracurium, N(%)                                       | 220. (0.0)     | 31. (0.0)      |
| Colchicine, N(%)                                           | 23016. (2.4)   | 5520. (2.4)    |
| Corticosteroid, N(%)                                       | 351344. (37.1) | 77266. (33.6)  |
| Degarelix, N(%)yrs                                         | 180. (0.0)     | 29. (0.0)      |
| Dexamethasone, N(%)                                        | 36265. (3.8)   | 7194. (3.1)    |
| Dobutamine, N(%)                                           | 1096. (0.1)    | 210. (0.1)     |
| Eculizumab, N(%)                                           | 15. (0.0)      | 3. (0.0)       |
| Epinephrine, N(%)                                          | 25280. (2.7)   | 5415. (2.4)    |
| Estrogen, N(%)                                             | 19990. (2.1)   | 4406. (1.9)    |
| Famotidine, N(%)                                           | 80219. (8.5)   | 17206. (7.5)   |
| Furosemide, N(%)                                           | 108865. (11.5) | 24734. (10.7)  |
| Glucocorticoid, N(%)                                       | 216312. (22.9) | 46602. (20.2)  |
| Histamine 2 Receptor Blocker, N(%)                         | 83648. (8.8)   | 16959. (7.4)   |
| Hydrochlorothiazide, N(%)                                  | 143246. (15.1) | 34283. (14.9)  |
| Hydroxychloroquine, N(%)                                   | 7416. (0.8)    | 1510. (0.7)    |
| Inhaled Corticosteroids, N(%)                              | 19658. (2.1)   | 4182. (1.8)    |
| Inhaled Corticosteroids and Long-Acting Beta-Agonist, N(%) | 104819. (11.1) | 22246. (9.7)   |
| Induction Ventilation Medications, N(%)                    | 19185. (2.0)   | 3432. (1.5)    |
| Inhaled Budesonide, N(%)                                   | 3306. (0.3)    | 714. (0.3)     |
| Inhaled Epo-prostenol, N(%)                                | 94. (0.0)      | 26. (0.0)      |
| Isoproterenol, N(%)                                        | 112. (0.0)     | 20. (0.0)      |
| Long-Acting Beta-Agonist, N(%)                             | 3562. (0.4)    | 686. (0.3)     |
| Lopinavir, N(%)                                            | 69. (0.0)      | 10. (0.0)      |
| Losartan, N(%)                                             | 107423. (11.4) | 27223. (11.8)  |
| Metformin, N(%)                                            | 171484. (18.1) | 45995. (20.0)  |
| Milrinone, N(%)                                            | 556. (0.1)     | 115. (0.0)     |
| Norepinephrine, N(%)                                       | 4509. (0.5)    | 982. (0.4)     |
| Non-steroidal Anti-Inflammatory Drug, N(%)                 | 565074. (59.7) | 128784. (55.9) |
| Opioid, N(%)                                               | 56275. (5.9)   | 9747. (4.2)    |
| Platelet Aggregation Inhibitor, N(%)                       | 64141. (6.8)   | 14702. (6.4)   |
| Phenylephrine, N(%)                                        | 17529. (1.9)   | 3220. (1.4)    |
| Proton Pump Inhibitor, N(%)                                | 348099. (36.8) | 76583. (33.3)  |
| Remdesivir, N(%)                                           | 8. (0.0)       | 40. (0.0)      |
| Ribavirin, N(%)                                            | 136. (0.0)     | 13. (0.0)      |
| Rosiglitazone, N(%)                                        | 0. (0.0)       | 0. (0.0)       |
| Sarilumab, N(%)                                            | 11. (0.0)      | 1. (0.0)       |
| Selective Estrogen Receptor Degradar, N(%)                 | 46. (0.0)      | 4. (0.0)       |
| Selective Estrogen Receptor Modulators, N(%)               | 804. (0.1)     | 157. (0.1)     |
| Serotonin and Norepinephrine Reuptake Inhibitors, N(%)     | 134438. (14.2) | 28062. (12.2)  |
| Selective Serotonin Reuptake Inhibitors, N(%)              | 192925. (20.4) | 43320. (18.8)  |

---

|                   |                |                |
|-------------------|----------------|----------------|
| Statin, N(%)      | 461512. (48.8) | 108101. (46.9) |
| Tocilizumab, N(%) | 342. (0.0)     | 84. (0.0)      |
| Tricyclic, N(%)   | 45863. (4.8)   | 9404. (4.1)    |
| Valsartan, N(%)   | 14252. (1.5)   | 3443. (1.5)    |
| Vasopressin, N(%) | 1582. (0.2)    | 328. (0.1)     |
| Vasopressor, N(%) | 20231. (2.1)   | 4269. (1.9)    |
| Vecuronium, N(%)  | 60. (0.0)      | 7. (0.0)       |
| Never Smokers     | 334659. (35.4) | 97419. (42.3)  |
| Former Smokers    | 402724. (42.6) | 103482. (44.9) |
| Current Smokers   | 208673. (22.1) | 29349. (12.7)  |

---

**Table S4:** Pre-existing respiratory diseases

| Variables                                   | Never<br>Smoker<br>n = 423972 | Former<br>Smoker<br>n = 505465 | p-Value  | Current<br>Smoker<br>n = 245127 | p-Value   | Unknown<br>Smoker<br>n = 130427 | p-Value  |
|---------------------------------------------|-------------------------------|--------------------------------|----------|---------------------------------|-----------|---------------------------------|----------|
| Chronic Lung Disease, N(%)                  | 110297 (26.0)                 | 187984 (37.2)                  | p<0.0001 | 101492 (41.4)                   | p<0.0001  | 12233 (9.4)                     | p<0.0001 |
| Obstructive Sleep Apnea, N(%)               | 143519 (33.9)                 | 169011 (33.4)                  | p<0.0001 | 61377 (25)                      | p<0.0001  | 11160 (8.6)                     | p<0.0001 |
| Chronic Obstructive Pulmonary Disease, N(%) | 39445 (9.3)                   | 111223 (22)                    | p<0.0001 | 69962 (28.5)                    | p<0.0001  | 6569 (5)                        | p<0.0001 |
| Asthma, N(%)                                | 36058 (8.5)                   | 35361 (7)                      | p<0.0001 | 12304 (5)                       | p<0.0001  | 2855 (2.2)                      | p<0.0001 |
| Lower Respiratory Infection, N(%)           | 35529 (8.4)                   | 41361 (8.2)                    | p<0.0001 | 19316 (7.9)                     | p<0.0001  | 4587 (3.5)                      | p<0.0001 |
| Bronchitis, N(%)                            | 27671 (6.5)                   | 39182 (7.8)                    | p<0.0001 | 20514 (8.4)                     | p<0.0001  | 2936 (2.3)                      | p<0.0001 |
| Pneumonia, N(%)                             | 18381 (4.3)                   | 35078 (6.9)                    | p<0.0001 | 15428 (6.3)                     | p<0.0001  | 3522 (2.7)                      | p<0.0001 |
| Influenza, N(%)                             | 7785 (1.8)                    | 9463 (1.9)                     | p<0.0001 | 4980 (2)                        | p<0.0001  | 1263 (1)                        | p<0.0001 |
| Pulmonary Heart Disease, N(%)               | 7235 (1.7)                    | 13973 (2.8)                    | p<0.0001 | 4325 (1.8)                      | p = 0.003 | 1012 (0.8)                      | p<0.0001 |
| Acute Respiratory Failure, N(%)             | 7207 (1.7)                    | 16829 (3.3)                    | p<0.0001 | 8193 (3.3)                      | p<0.0001  | 1721 (1.3)                      | p<0.0001 |
| Emphysema, N(%)                             | 3374 (0.8)                    | 13553 (2.7)                    | p<0.0001 | 8966 (3.7)                      | p<0.0001  | 647 (0.5)                       | p<0.0001 |
| Acute Respiratory Distress Syndrome, N(%)   | 201 (0)                       | 378 (0.1)                      |          | 175 (0.1)                       |           | 35 (0)                          |          |
| Complex Sleep Apnea, N(%)                   | 82 (0)                        | 90 (0)                         |          | 33 (0)                          |           | 7 (0)                           |          |
| Ventilator-Associated Pneumonia, N(%)       | 61 (0)                        | 136 (0)                        |          | 64 (0)                          |           | 30 (0)                          |          |

**Table S5.** Association between smoking status and COVID-19 positivity stratify by age for imputed and unimputed data

| Variables                                                          | Odds Ratio (95% Confidence intervals) |                          |
|--------------------------------------------------------------------|---------------------------------------|--------------------------|
|                                                                    | Unadjusted                            | Adjusted                 |
| <b>Imputed Unknown Smoker to Never, Former, and Current Smoker</b> |                                       |                          |
| Model 1 <sup>†</sup>                                               |                                       |                          |
| Former Smoker vs. Never Smoker                                     | <b>0.88 (0.87, 0.89)</b>              | <b>0.89 (0.88, 0.90)</b> |
| Current Smoker vs. Never Smoker                                    | <b>0.48 (0.47, 0.49)</b>              | <b>0.51 (0.50, 0.52)</b> |
| Model 2 <sup>‡</sup>                                               |                                       |                          |
| <i>Age ≥ 65</i>                                                    |                                       |                          |
| Former Smoker vs. Never Smoker                                     | 0.99 (0.97, 1.00)                     | 0.98 (0.97, 1.00)        |
| Current Smoker vs. Never Smoker                                    | <b>0.50 (0.49, 0.51)</b>              | <b>0.52 (0.51, 0.53)</b> |
| <i>Age &lt; 65</i>                                                 |                                       |                          |
| Former Smoker vs. Never Smoker                                     | <b>0.83 (0.81, 0.84)</b>              | <b>0.83 (0.81, 0.84)</b> |
| Current Smoker vs. Never Smoker                                    | <b>0.47 (0.46, 0.48)</b>              | <b>0.48 (0.47, 0.49)</b> |
| <b>Unimputed Unknown Smoker</b>                                    |                                       |                          |
| Model 1 <sup>†</sup>                                               |                                       |                          |
| Former Smoker vs. Never Smoker                                     | <b>0.89 (0.88, 0.90)</b>              | <b>0.90 (0.89, 0.91)</b> |
| Current Smoker vs. Never Smoker                                    | <b>0.47 (0.46, 0.48)</b>              | <b>0.50 (0.49, 0.51)</b> |
| Unknown Smoker vs. Never Smoker                                    | <b>0.89 (0.88, 0.90)</b>              | <b>0.93 (0.91, 0.94)</b> |
| Model 2 <sup>‡</sup>                                               |                                       |                          |
| <i>Age ≥ 65</i>                                                    |                                       |                          |
| Former Smoker vs. Never Smoker                                     | 1.01 (0.99, 1.02)                     | 1.00 (0.99, 1.01)        |
| Current Smoker vs. Never Smoker                                    | <b>0.50 (0.49, 0.51)</b>              | <b>0.51 (0.50, 0.53)</b> |
| Unknown Smoker vs. Never Smoker                                    | <b>1.27 (1.24, 1.31)</b>              | <b>1.22 (1.18, 1.25)</b> |
| <i>Age &lt; 65</i>                                                 |                                       |                          |
| Former Smoker vs. Never Smoker                                     | <b>0.83 (0.82, 0.84)</b>              | <b>0.83 (0.82, 0.84)</b> |
| Current Smoker vs. Never Smoker                                    | <b>0.45 (0.44, 0.46)</b>              | <b>0.48 (0.47, 0.49)</b> |
| Unknown Smoker vs. Never Smoker                                    | <b>0.75 (0.74, 0.76)</b>              | <b>0.82 (0.80, 0.83)</b> |

<sup>†</sup> Model 1 adjusted by Age ≥ 85, BMI < 18.5, BMI ≥ 30, Sex, Former Smoker, Current Smoker, Cancer, Dementia, Hispanic or Latino, Low Respiratory Infections, Pneumonia, Phenylephrine, and Septic Shock.

<sup>‡</sup> Model 2 stratified by age and adjusted by BMI < 18.5, BMI ≥ 30, Sex, Former Smoker, Current Smoker, Cancer, Dementia, Hispanic or Latino, Low Respiratory Infections, Pneumonia, Phenylephrine, and Septic Shock.

Bold indicate reduced risk of SARS-CoV-2 infection.
